# Supplementary material for: Construction and evaluation of a nomogram for predicting survival in patients with lung cancer
Source: publisher site journal article supplement (doi:10.18632/aging.203974), 2022-03-23
Supplement: Supplementary file [file aging-v14i6-203974-supplementary-material-SD1.pdf]

**SUPPLEMENTARY FIGURES**

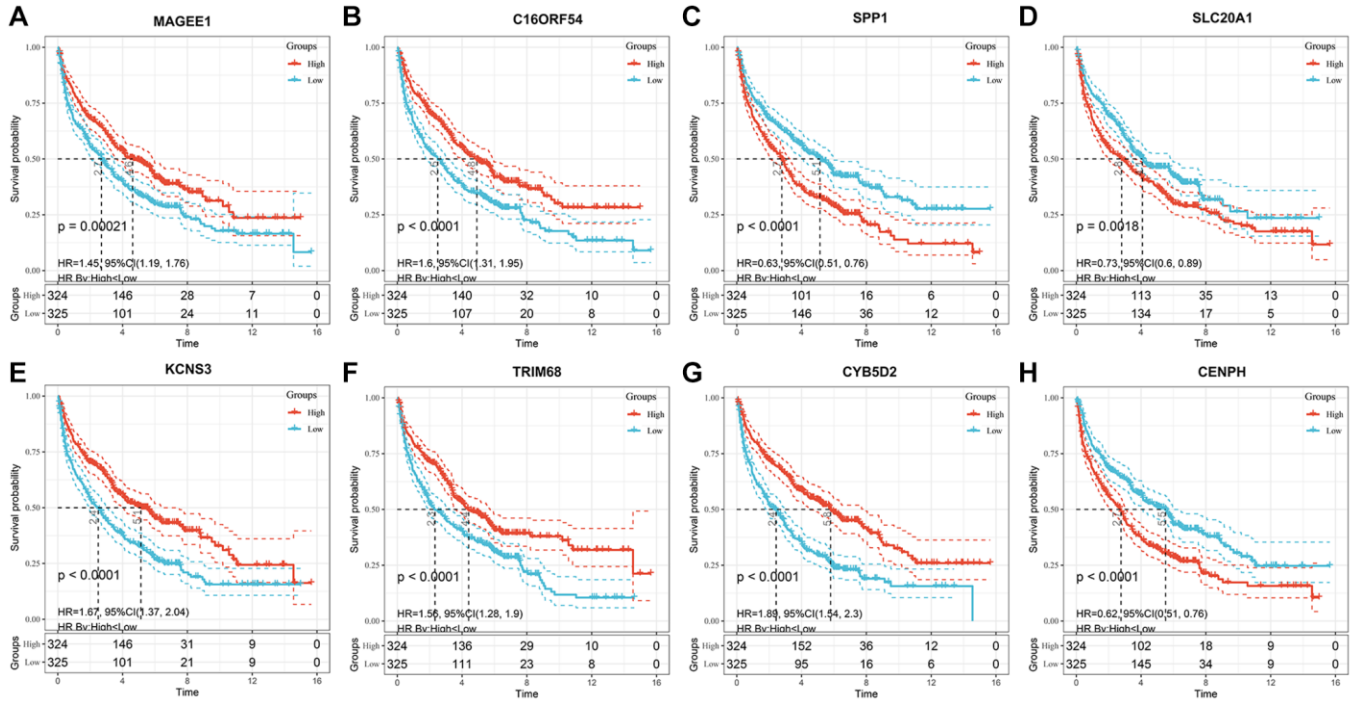

**Supplementary Figure 1. The K-M survival curve analyses of 8-genes. (A) MAGEE1; (B) C16ORF54; (C) SPP1; (D) SLC20A1; (E) KCNS3; (F) TRIM68; (G) CYB5D2; (H) CENPH.**

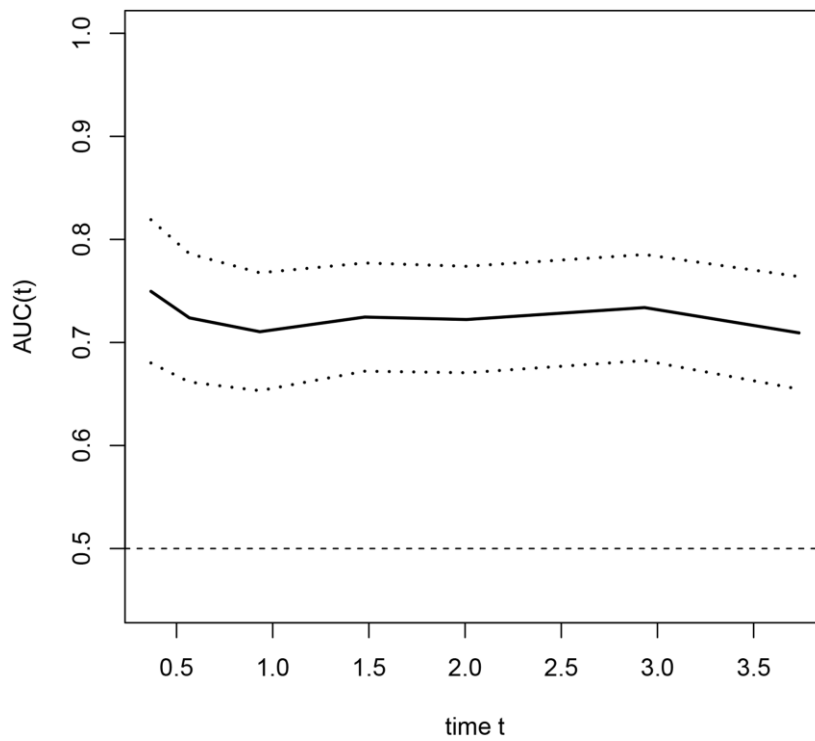

**Supplementary Figure 2. The tROC analysis of the PRS.**

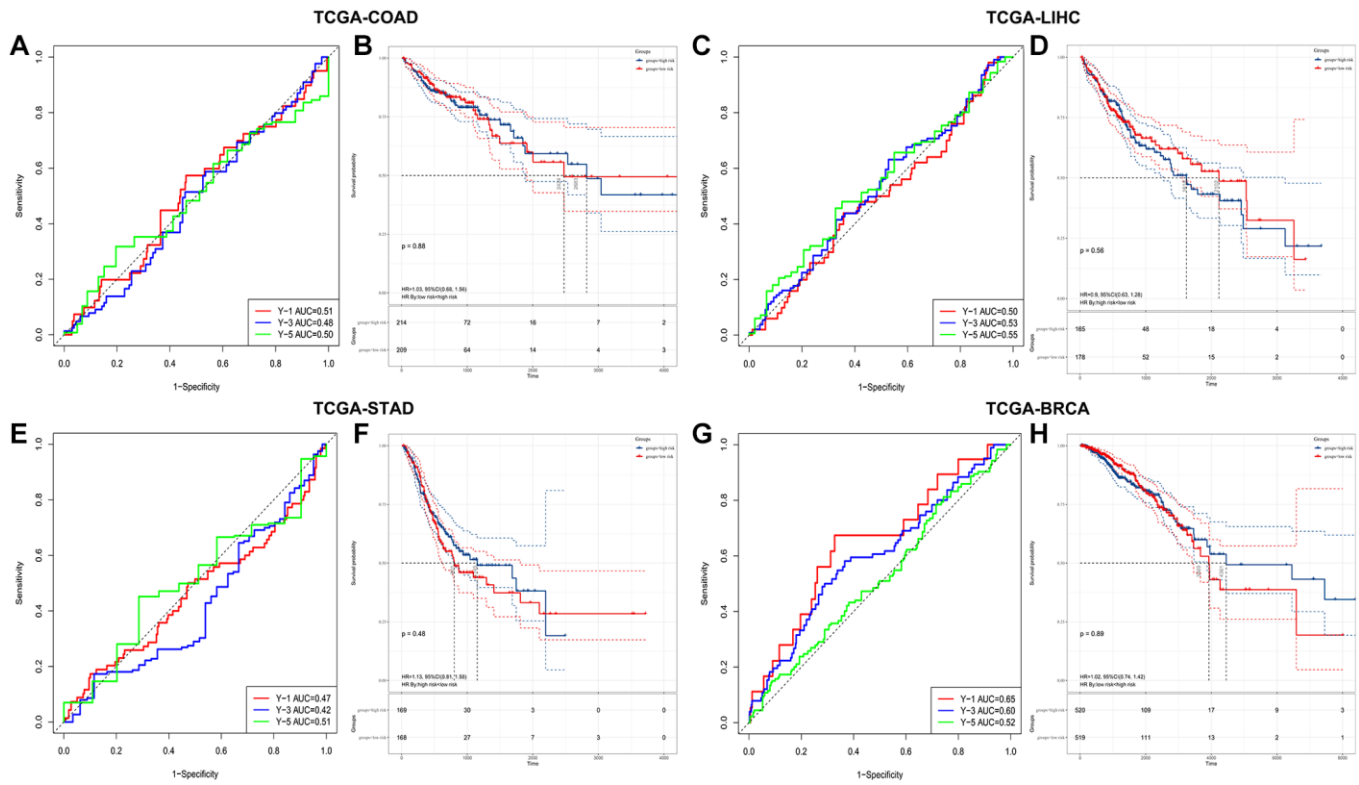

**Supplementary Figure 3. The PRS as a valuable predictor for OS in other cancers. (A, B) TCGA-COAD; (C, D) TCGA-LIHC; (E, F) TCGA-STAD; (G, H) TCGA-BRCA.**

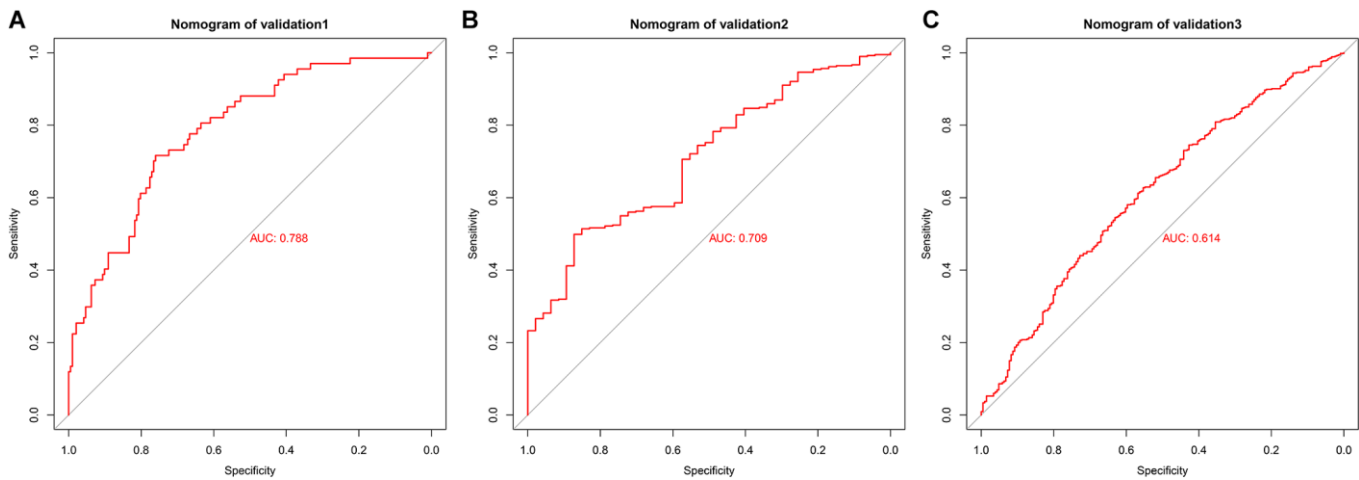

**Supplementary Figure 4. ROC analysis of the complex model in validation sets. (A) the validation set I; (B) the validation set II; (C) the validation set III.**
