# Supplementary material for: Construction and evaluation of a nomogram for predicting survival in patients with lung cancer
Source: publisher site journal article supplement (doi:10.18632/aging.203974), 2022-03-23
Supplement: Supplementary file [file aging-v14i6-203974-supplementary-material-SD2.pdf]

## SUPPLEMENTARY TABLE

Supplementary Table 1. Information on the datasets in the training and validation sets.

| Cohorts                    | Datasets  | Year | Country | Sample      | <i>N</i> |
|----------------------------|-----------|------|---------|-------------|----------|
| Training set               | GSE30219  | 2011 | France  | lung cancer | 274      |
|                            | GSE37745  | 2012 | Sweden  | NSCLC       | 196      |
|                            | GSE50081  | 2013 | Canada  | NSCLC       | 181      |
| Validation set I           | GSE29013  | 2011 | USA     | NSCLC       | 55       |
|                            | GSE31210  | 2011 | Japan   | LUAD        | 204      |
| Validation set II          | GSE41271  | 2012 | USA     | lung cancer | 268      |
|                            | GSE42127  | 2012 | USA     | NSCLC       | 173      |
| Validation set III         | TCGA-LUAD | 2014 | USA     | LUAD        | 494      |
|                            | TCGA-LUSC | 2014 | USA     | LUSC        | 480      |
|                            | TCGA-LIHC | 2015 | USA     | LIHC        | 343      |
| Specificity validation set | TCGA-COAD | 2015 | USA     | COAD        | 423      |
|                            | TCGA-STAD | 2015 | USA     | STAD        | 337      |
|                            | TCGA-BRCA | 2015 | USA     | BRCA        | 1039     |
